# Supplementary material for: Molecular landmarks of tumor disulfidptosis across cancer types to promote disulfidptosis-target therapy
Source: PubMed Central journal article supplement — Redox Biol. 2023 Nov 19;68:102966. doi: 10.1016/j.redox.2023.102966 (PMC10698012; doi:10.1016/j.redox.2023.102966), 2023-11-19
Supplement: mmc1.pdf [file mmc1.pdf]

# Report of Human Cell Line Authentication

( Notice: This authentication report is restricted to the cell sold from Guangzhou Cellcook Biotech Co. ,Ltd, and the date with seal is the date of delivery. )

## ? Sample

Sample Name: labeled as 'SK-MEL-28'

## ? Method and Procedure

1. PCR is amplified with STR Multi-amplification Kit (PowerPlex™16HS System);
2. PCR products are assayed with 3100 DNA Analyzer (Applied Biosystems®).
3. Amplification of gene COX1 and electrophoresis are employed to survey the species of the sample.

## ? Results

1. The STR profiles of the cell line sample are in the attached table and figure.
2. The search result in ATCC and DSMZ databases.
3. The electrophoresis figure of gene COX1.

SK-MEL-28: ①One loci has tri-alleles (TPOX). Contamination of other human cell line is not found (Figure 1 & Table 1). ②100% matched cell lines are not found in ATCC and DSMZ data banks. The percentage of matching to SK-MEL-28 is 82%. (Figure 2 & Figure 3). ③The sample is a human cell line. Contamination of other species cells are not found in the sample (Figure 4).

Operator: Xiaohua Mo

Auditor: Xuanyi Liang

Guangzhou Cellcook Biotech Co., Ltd

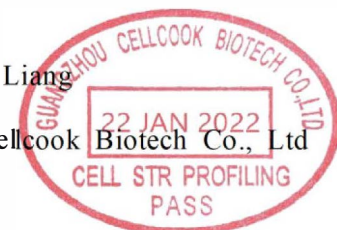

Figure 1. STR profiles of SK-MEL-28 cell line

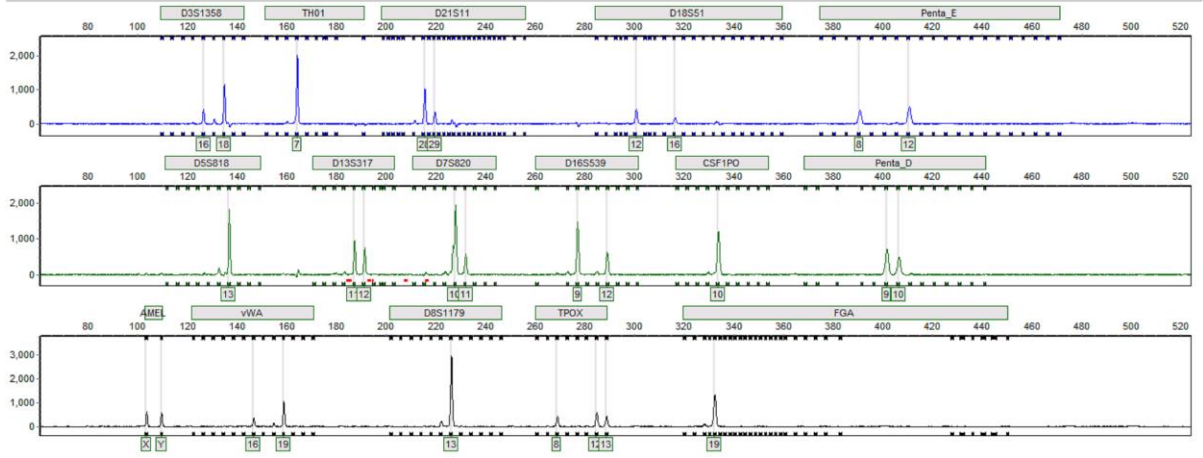

Table 1. STR profiles of SK-MEL-28 cell line

|         | Allele1 | Allele2 | Allele3 |
|---------|---------|---------|---------|
| D3S1358 | 16      | 18      |         |
| TH01    | 7       |         |         |
| D21S11  | 28      | 29      |         |
| D18S51  | 12      | 16      |         |
| Penta_E | 8       | 12      |         |
| D5S818  | 13      |         |         |
| D13S317 | 11      | 12      |         |
| D7S820  | 10      | 11      |         |
| D16S539 | 9       | 12      |         |
| CSF1PO  | 10      |         |         |
| Penta_D | 9       | 10      |         |
| AMEL    | x       | y       |         |
| vWA     | 16      | 19      |         |
| D8S1179 | 13      |         |         |
| TPOX    | 8       | 12      | 13      |
| FGA     | 19      |         |         |

Figure 2. Search result in ATCC database

## SEARCH THE STR DATABASE

As part of our continuing efforts to characterize and authenticate the cell lines in the Cell Biology collection, ATCC has developed a comprehensive database of short tandem repeat (STR) DNA profiles for all of our human cell lines. [View our brief tutorial before starting.](#)

1. [STR Profiling Analysis](#)
2. [Matching Algorithm](#)
3. [Interrogating the Database](#)

Showing 1 - 2 Of 2

PageSize: 100 ▾

| Add to Cart              | %Match | ATCC® Number | Designation               | D5S818 | D13S317 | D7S820 | D16S539 | vWA   | TH01 | AMEL | TPOX | CSF1PO |
|--------------------------|--------|--------------|---------------------------|--------|---------|--------|---------|-------|------|------|------|--------|
| <input type="checkbox"/> | 82.0   | HTB-72       | SK-MEL-28MelanomaHuman    | 11,13  | 11,12   | 9,3,10 | 9,12    | 16,19 | 7    | X,Y  | 8,12 | 10,12  |
| <input type="checkbox"/> | 82.0   | CRL-2021     | MEG-01MegakaryoblastHuman | 13     | 8       | 11     | 9       | 16    | 7    | X,Y  | 8,11 | 10     |

Add to Cart

Export to Excel

**Disclaimer:** Reference to this database and the data contained therein may be cited in publications, and ATCC encourages such citation or reference. While every reasonable effort has been made to assure the accuracy of these data, no warranty, express or implied, is made by ATCC as to their accuracy.

While ATCC has largely used the Promega PowerPlex® 1.2 System in the creation of these data and recommends

Figure 3. Search result in DSMZ database

**Result of STR matching analysis by your data.** - DSMZ Profile Database -

A graphical presentation is shown at the bottom of this page.

| EV          | Cell No.  | Cell name                | Locus names  |              |              |             |              |            |            |                |              | Figures |
|-------------|-----------|--------------------------|--------------|--------------|--------------|-------------|--------------|------------|------------|----------------|--------------|---------|
|             |           |                          | D5S818       | D13S317      | D7S820       | D16S539     | VWA          | TH01       | AM         | TPOX           | CSF1PO       |         |
|             |           | <i>Query (Your Cell)</i> | <i>13,13</i> | <i>11,12</i> | <i>10,11</i> | <i>9,12</i> | <i>16,19</i> | <i>7,7</i> | <i>X,Y</i> | <i>8,12,13</i> | <i>10,10</i> |         |
| 0.81(30/37) | HTB-72    | SK-MEL-28                | 11,13        | 11,12        | 10,10        | 9,12        | 16,19        | 7,7        | X,Y        | 8,12           | 10,12        | -       |
| 0.81(30/37) | RCB1930   | SK-MEL-28                | 11,13        | 11,12        | 10,10        | 9,12        | 16,19        | 7,7        | X,Y        | 8,12           | 10,12        | -       |
| 0.70(26/37) | CRL-2056  | CCD-1043Sk               | 13,13        | 11,12        | 10,10        | 9,11        | 16,19        | 7,7        | X,Y        | 8,11           | 12,12        | -       |
| 0.65(24/37) | 364       | MEG-01                   | 13,13        | 8,8          | 11,11        | 9,9         | 16,16        | 7,7        | X,Y        | 8,11           | 10,10        | -       |
| 0.65(24/37) | CCL-137   | HEL 299                  | 11,13        | 11,12        | 8,11         | 10,11       | 16,16        | 7,7        | X,Y        | 8,12           | 7,10         | -       |
| 0.65(24/37) | CRL-2021  | MEG-01                   | 13,13        | 8,8          | 11,11        | 9,9         | 16,16        | 7,7        | X,Y        | 8,11           | 10,10        | -       |
| 0.65(24/37) | CRL-5867  | NCI-H1385 [H1385]        | 13,13        | 11,11        | 8,10         | 9,11        | 17,19        | 7,7        | X,X        | 8,9            | 10,10        | -       |
| 0.65(24/37) | IFO50151  | MEG-01                   | 13,13        | 8,8          | 11,11        | 9,9         | 16,16        | 7,7        | X,Y        | 8,11           | 10,10        | -       |
| 0.65(24/37) | SCRC-2002 | hES BG01V                | 10,12        | 11,12        | 10,11        | 9,11        | 16,17        | 7,9.3      | X,Y        | 8,8            | 10,10        | -       |

Figure 4. Authentication of the species of the sample

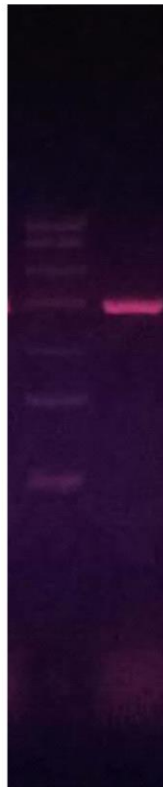

M: Marker. As the size of 700, 600, 500, 400, 300, 200 and 100bp from up to down.

Nine species are checked, as follow: *Homo sapiens* 391bp, *Cricetulus griseus* 315bp, *Macaca mulatta* 287bp, *Cercopithecus aethiops* 222bp, *Rattus norvegicus* 196bp, *Canis familiaris* 172bp, *Mus musculus* 150bp, *Bos Taurus* 102bp, IC 70bp

The sample: The band size is 391bp which matches the size of human.

# 细胞 STR 检测报告

一、样品名称/编号：A-375

二、检测项目：STR 基因型检验

三、检测方法：用天根的基因组抽提试剂盒提取 DNA，采用 21-STR 扩增方案扩增，在 Seqstudio 型遗传分析仪上对 STR 位点和性别基因 Amelogenin 进行检测。

四、检验结果：

## 1. 检验基本情况

| 多等位基因 | 匹配细胞系 | 细胞库    | EV 值 | 匹配说明 |
|-------|-------|--------|------|------|
| 无     | A-375 | ExPASy | 1.00 | 完全匹配 |

多等位基因指三等位及以上基因现象。

本次检测各细胞分型结果良好。

## 2. 样本描述

该株细胞 DNA 分型在细胞系检索中找到完全匹配的细胞系，ExPASy 数据库显示细胞名为 A-375 细胞号对应 CVCL-0132。本次检测在该细胞系中没有发现多等位基因。

## 3. 匹配说明

待测细胞系与收录于 ATCC, DSMZ, JCRB 和 ExPASy 数据库的细胞系 STR 数据进行比对，未收录于以上细胞库的细胞系将无法匹配。

附表：A-375 细胞的 STR 位点和 Amelogenin 位点的基因分型结果

| A-375 细胞 |          |          |          |
|----------|----------|----------|----------|
| Marker   | Allele 1 | Allele 2 | Allele 3 |
| D19S433  | 13       | 14.2     |          |
| D5S818   | 12       | 12       |          |
| D21S11   | 29       | 30       |          |
| D18S51   | 12       | 17       |          |
| D6S1043  | 11       | 14       |          |
| AMEL     | X        | X        |          |
| D3S1358  | 15       | 17       |          |
| D13S317  | 11       | 14       |          |
| D7S820   | 9        | 9        |          |
| D16S539  | 9        | 9        |          |
| CSF1PO   | 11       | 12       |          |
| Penta D  | 9        | 15       |          |
| D2S441   | 11       | 11       |          |
| vWA      | 16       | 17       |          |
| D8S1179  | 11       | 14       |          |
| TPOX     | 8        | 10       |          |
| Penta E  | 10       | 12       |          |
| TH01     | 8        | 8        |          |
| D12S391  | 18       | 21       |          |
| D2S1338  | 16       | 24       |          |
| FGA      | 23       | 23       |          |

## 附图：ExPASy 数据库比对结果

| Accession | Name                          | N° Markers | Score       | Amel | CSF1PO | D2S1338 | D3S1358 | D5S818 | D7S820 | D8S1179 | D13S317 | D16S539 | D18S51 | D19S433 | D21S11 | FGA | Penta D | Penta E | TH01 | TPOX | vWA   |
|-----------|-------------------------------|------------|-------------|------|--------|---------|---------|--------|--------|---------|---------|---------|--------|---------|--------|-----|---------|---------|------|------|-------|
| NA        | Query                         | NA         | NA          | x    | 11,12  |         |         | 12     | 9      |         | 11,14   | 9       |        |         |        |     |         |         | 8    | 8,10 | 16,17 |
| CVCL_D132 | A-375                         | 8          | 100.0<br>0% | X    | 11,12  | 16,24   | 15,17   | 12     | 9      | 11,14   | 11,14   | 9       | 12,17  | 13,14,2 | 29,30  | 23  | 9,15    | 10,12   | 8    | 8,10 | 16,17 |
| CVCL_UD29 | A-375 KRAS<br>p.G13D          | 8          | 100.0<br>0% | X    | 11,12  |         |         | 12     | 9      |         | 11,14   | 9       |        |         |        |     |         |         | 8    | 8,10 | 16,17 |
| CVCL_UR34 | A-375 KRAS<br>p.G13D-Luc<br>2 | 8          | 100.0<br>0% | X    | 11,12  |         |         | 12     | 9      |         | 11,14   | 9       |        |         |        |     |         |         | 8    | 8,10 | 16,17 |

## 分型方案及位点分布

|   | 方案 1    | 方案 2    | 方案 3    | 方案 4    |
|---|---------|---------|---------|---------|
| 1 | D19S433 | AMEL    | D2S441  | TH01    |
| 2 | D5S818  | D3S1358 | vWA     | D12S391 |
| 3 | D21S11  | D13S317 | D8S1179 | D2S1338 |
| 4 | D18S51  | D7S820  | TPOX    | FGA     |
| 5 | D6S1043 | D16S539 | Penta E |         |
| 6 |         | CSF1PO  |         |         |
| 7 |         | Penta D |         |         |

检测人：张葡萄

审核人：殷世腾

签发日期：2023.06.12

河南省工业微生物菌种工程技术研究中心

Henan Engineering Research Center of Industrial Microbiology

网址：www.bncc.com 电话：400-6699-8333

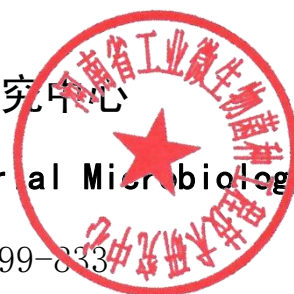

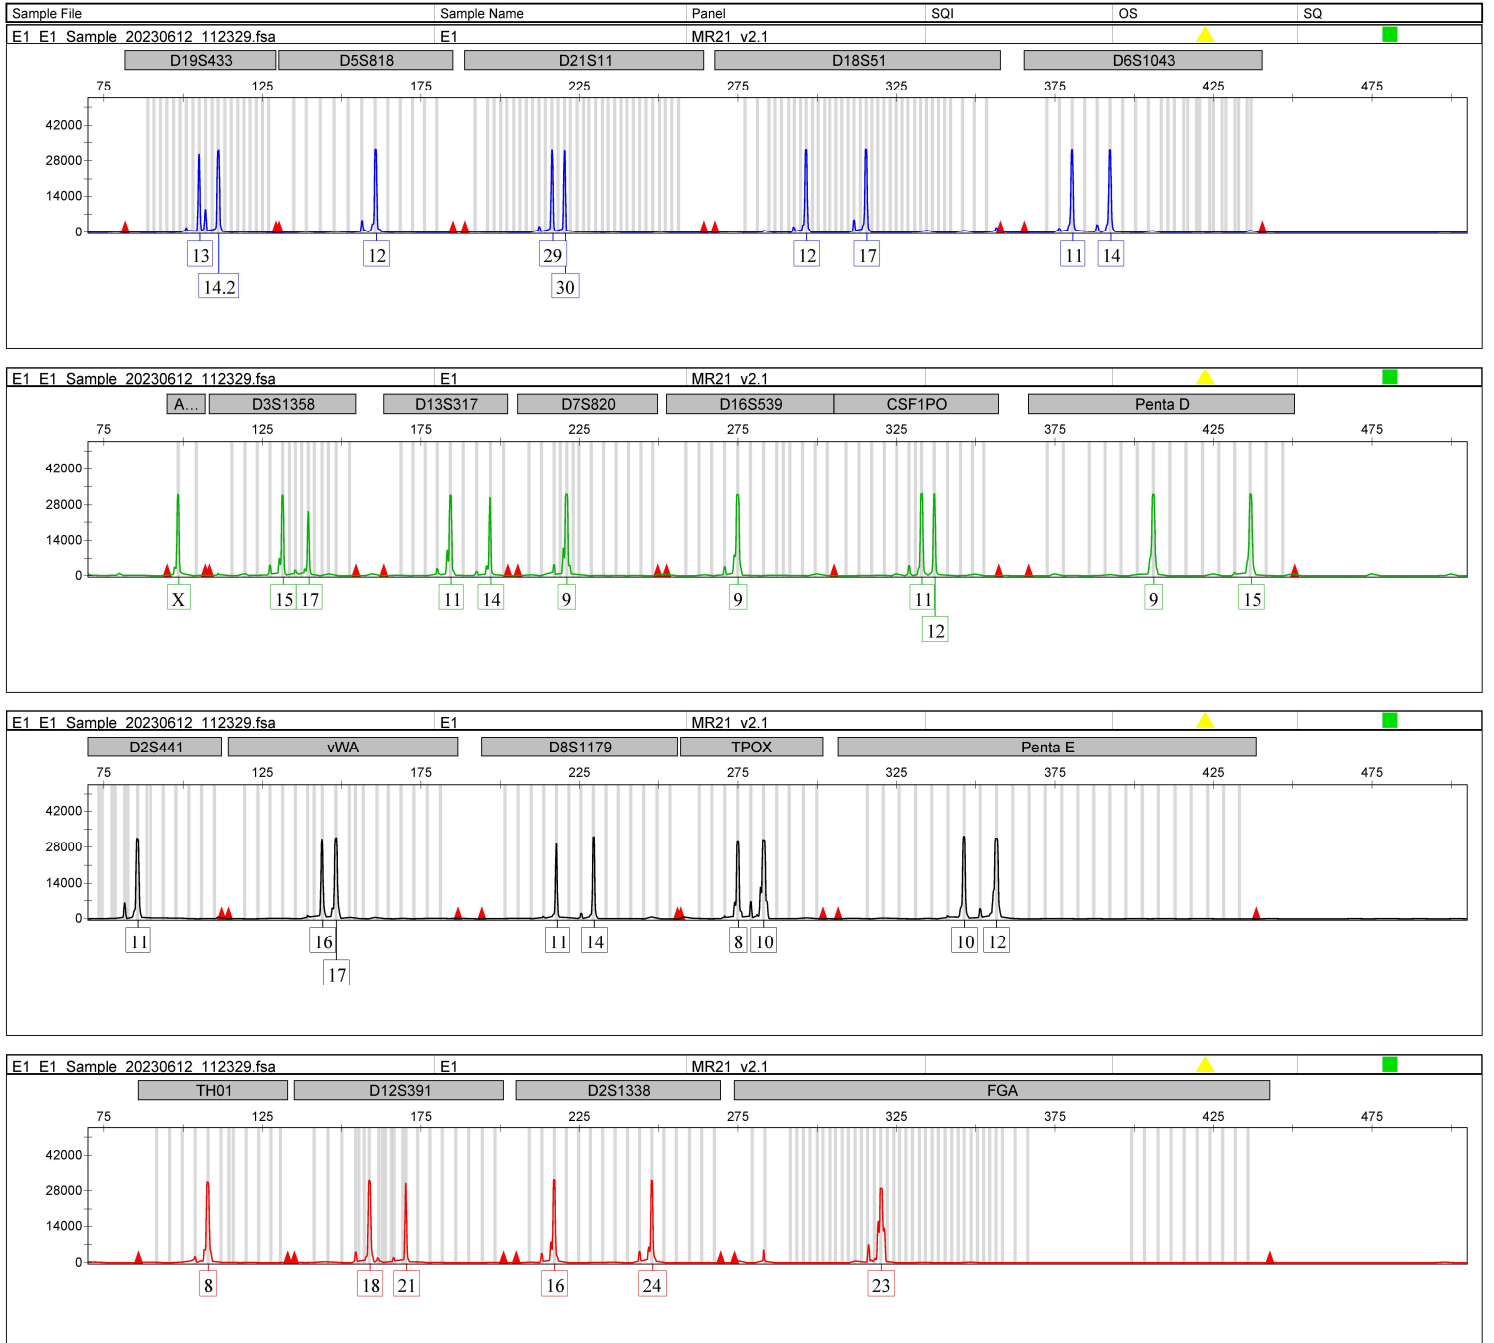



The above is a Chinese A375 cell STR testing report from Henan Engineering Research Center of Industrial Microbiology of China. To better understand, we have translated this report into English and presented below.

## Cell STR Testing Report

1. Sample Name/ID: A-375
2. Testing Item: STR Genotyping Test
3. Testing Method: DNA extraction was performed using TianGen's genomic extraction kit. The 21-STR amplification protocol was applied, and the STR loci as well as the gender gene Amelogenin were analyzed using the Seqstudio genetic analyzer.

### 4. Testing Result:

#### (1) General information

| Multi-allelic genes | Matched cell line | Cell bank | EV value | Matching explanation |
|---------------------|-------------------|-----------|----------|----------------------|
| None                | A-375             | ExpPASy   | 1.00     | Complete match       |

Multi-allelic gene refers to the phenomenon of having three or more alleles.

The cell typing results for this test are satisfactory.

#### (2) Sample Description

The DNA typing of this cell strain found a cell line that is a perfect match in the cell line retrieval, and the ExpPASy database showed that the cell is named A-375 with the corresponding cell number CVCL-0132. No multi-allelic genes were found in this cell line during this test.

#### (3) Matching Explanation

The cell line under test was compared with the STR data of cell lines recorded in the ATCC, DSMZ, JCRB, and ExpPASy databases. Cell lines that are not included in the aforementioned cell line repositories will not be able to find a match.

Appendix: Genotyping results of STR loci and Amelogenin locus for A-375 cells.

| A-375 cells |          |          |          |
|-------------|----------|----------|----------|
| Marker      | Allele 1 | Allele 2 | Allele 3 |
| D19S433     | 13       | 14.2     |          |
| D5S818      | 12       | 12       |          |
| D21S11      | 29       | 30       |          |
| D18S51      | 12       | 17       |          |
| D6S1043     | 11       | 14       |          |
| AMEL        | X        | X        |          |
| D3S1358     | 15       | 17       |          |
| D13S317     | 11       | 14       |          |
| D7S820      | 9        | 9        |          |
| D16S539     | 9        | 9        |          |
| CSF1PO      | 11       | 12       |          |
| Penta D     | 9        | 15       |          |
| D2S441      | 11       | 11       |          |
| vWA         | 16       | 17       |          |
| D8S1179     | 11       | 14       |          |
| TPOX        | 8        | 10       |          |
| Penta E     | 10       | 12       |          |
| TH01        | 8        | 8        |          |
| D12S391     | 18       | 21       |          |
| D2S1338     | 16       | 24       |          |
| FGA         | 23       | 23       |          |

Appendix: Comparison results with the ExPASy database.

Genotyping scheme and locus distribution

|   | Plan 1  | Plan2   | Plan3   | Plan4   |
|---|---------|---------|---------|---------|
| 1 | D19S433 | AMEL    | D2S441  | TH01    |
| 2 | D5S818  | D3S1358 | vWA     | D12S391 |
| 3 | D21S11  | D13S317 | D8S1179 | D2S1338 |
| 4 | D18S51  | D7S820  | TPOX    | FGA     |
| 5 | D6S1043 | D16S539 | Penta E |         |
| 6 |         | CSF1PO  |         |         |
| 7 |         | Penta D |         |         |

Tested by: Putao Zhang

Reviewed by: Shiteng Yin

Date of Issuance: 2023.06.12

**Henan Engineering Research Center of Industrial Microbiology**

Website: [www.bncc.com](http://www.bncc.com) Telephone: 400-6699-833

## 细胞支原体检测报告

|         |                  |                                                                                      |             |            |                   |
|---------|------------------|--------------------------------------------------------------------------------------|-------------|------------|-------------------|
| 检测单位    |                  | 河南省工业微生物菌种工程技术研究中心                                                                   |             |            |                   |
| 检测方法    |                  | 实时荧光定量 PCR 法                                                                         |             |            |                   |
| 检测项目    |                  | A375 细胞支原体检测                                                                         |             |            |                   |
| 质检员     |                  | 代文灵                                                                                  | 审核员         | 何立胜        |                   |
| 检验日期    |                  | 2023.09.14                                                                           | 报告日期        | 2023.09.14 |                   |
| 检测      | CT 值             | 通道                                                                                   |             | CT 值       |                   |
|         |                  | FAM                                                                                  |             | N/A        |                   |
|         |                  | ROX                                                                                  |             | 26.86      |                   |
| 结果      | 曲线图              | 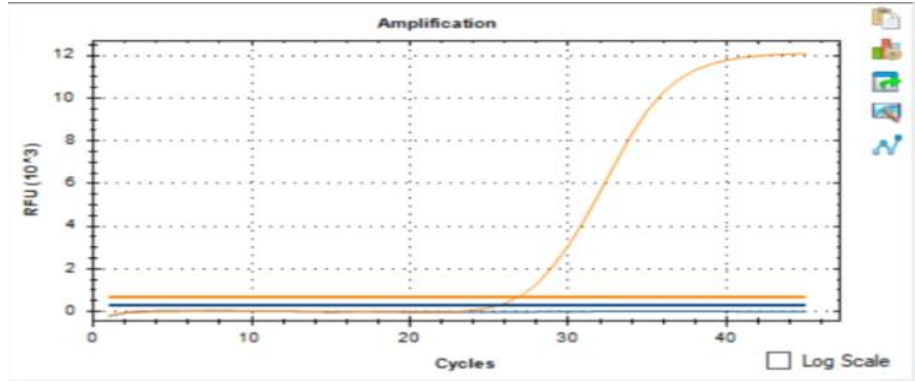 |             |            |                   |
| 检验及判定依据 | FAM Channel      |                                                                                      | ROX Channel |            | Interpretation    |
|         | Positive control |                                                                                      | Ct < 35     |            | Reagents works    |
|         | Positive control |                                                                                      | Ct > 35     |            | Reagents not work |
|         | Sample no Ct     |                                                                                      | Ct < 35     |            | Negative          |
|         | Sample Ct < 40   |                                                                                      | Ct < 35     |            | Positive          |
|         | Sample no Ct     |                                                                                      | Ct > 35     |            | PCR inhibition    |
| 检测结论    |                  | A375 细胞未受到支原体污染                                                                      |             |            |                   |

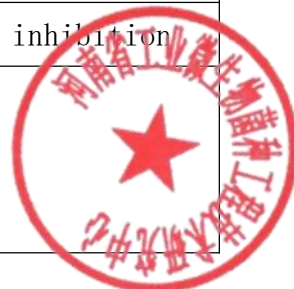

The above is a Chinese report from the Industrial Microbial Strain Engineering Technology Research Center regarding the detection of mycoplasma in A375 cells. To better understand, we have translated this report into English and presented below.

### Cell Mycoplasma Detection Reports

|                                      |                     |                                                                                             |                    |                       |
|--------------------------------------|---------------------|---------------------------------------------------------------------------------------------|--------------------|-----------------------|
| <b>Department</b>                    |                     | Industrial Microbial Strain Engineering Technology Research Center of Henan Province, China |                    |                       |
| <b>Method</b>                        |                     | Real-time fluorescent quantitative PCR method                                               |                    |                       |
| <b>Test Item</b>                     |                     | Mycoplasma detection of A375 cells                                                          |                    |                       |
| <b>Quality inspector</b>             |                     | Wenling Dai                                                                                 | <b>Auditor</b>     | Lisheng He            |
| <b>Inspection date</b>               |                     | 2023.09.14                                                                                  | <b>Report time</b> | 2023.09.14            |
| <b>Result</b>                        | <b>CT Value</b>     | <b>Channel</b>                                                                              |                    | <b>CT Value</b>       |
|                                      |                     | FAM                                                                                         |                    | N/A                   |
|                                      |                     | ROX                                                                                         |                    | 26.86                 |
|                                      | <b>Curve figure</b> |                                                                                             |                    |                       |
| <b>Inspection and judgment basis</b> |                     | <b>FAM Channel</b>                                                                          | <b>ROX Channel</b> | <b>Interpretation</b> |
|                                      |                     | Positive control                                                                            | Ct<35              | Reagents works        |
|                                      |                     | Positive control                                                                            | Ct>35              | Reagents not work     |
|                                      |                     | Sample no Ct                                                                                | Ct<35              | Negative              |
|                                      |                     | Sample Ct<40                                                                                | Ct<35              | Positive              |
|                                      |                     | Sample no Ct                                                                                | Ct>35              | PCR inhibition        |
| <b>Conclusion</b>                    |                     | <b>A375 cells were not contaminated by mycoplasma</b>                                       |                    |                       |

## 细胞支原体检测报告

|         |                      |                                                                                      |      |                   |
|---------|----------------------|--------------------------------------------------------------------------------------|------|-------------------|
| 检测单位    |                      | 河南省工业微生物菌种工程技术研究中心                                                                   |      |                   |
| 检测方法    |                      | 实时荧光定量 PCR 法                                                                         |      |                   |
| 检测项目    |                      | SK-MEL-28 细胞支原体检测                                                                    |      |                   |
| 质检员     |                      | 代文灵                                                                                  | 审核员  | 何立胜               |
| 检验日期    |                      | 2023.09.14                                                                           | 报告日期 | 2023.09.14        |
| 检测      | CT 值                 | 通道                                                                                   |      | CT 值              |
|         |                      | FAM                                                                                  |      | N/A               |
|         |                      | ROX                                                                                  |      | 28.06             |
| 结果      | 曲线图                  | 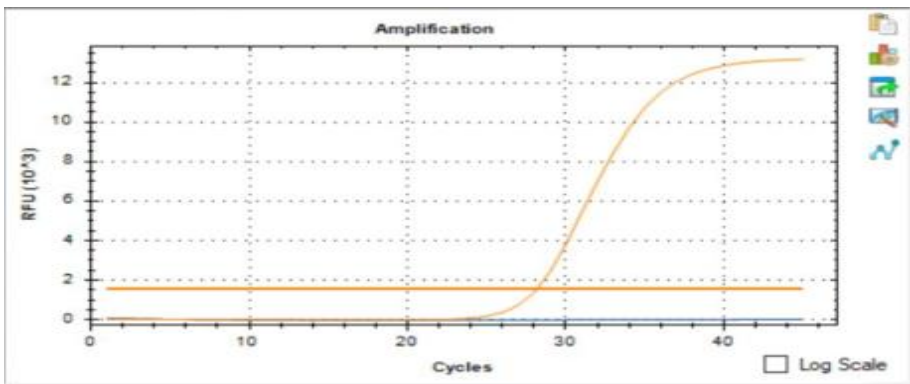 |      |                   |
| 检验及判定依据 | FAM Channel          | ROX Channel                                                                          |      | Interpretation    |
|         | Positive control     | Ct < 35                                                                              |      | Reagents works    |
|         | Positive control     | Ct > 35                                                                              |      | Reagents not work |
|         | Sample no Ct         | Ct < 35                                                                              |      | Negative          |
|         | Sample Ct < 40       | Ct < 35                                                                              |      | Positive          |
|         | Sample no Ct         | Ct > 35                                                                              |      | PCR inhibition    |
| 检测结论    | SK-MEL-28 细胞未受到支原体污染 |                                                                                      |      |                   |

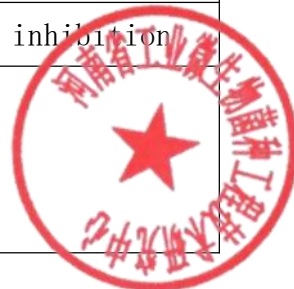

The above is a Chinese report from the Industrial Microbial Strain Engineering Technology Research Center regarding the detection of mycoplasma in SK-MEL-28 cells. To better understand, we have translated this report into English and presented below.

### Cell Mycoplasma Detection Reports

|                                      |                     |                                                                                             |                    |                       |
|--------------------------------------|---------------------|---------------------------------------------------------------------------------------------|--------------------|-----------------------|
| <b>Department</b>                    |                     | Industrial Microbial Strain Engineering Technology Research Center of Henan Province, China |                    |                       |
| <b>Method</b>                        |                     | Real-time fluorescent quantitative PCR method                                               |                    |                       |
| <b>Test Item</b>                     |                     | Mycoplasma detection of SK-MEL-28 cells                                                     |                    |                       |
| <b>Quality inspector</b>             |                     | Wenling Dai                                                                                 | <b>Auditor</b>     | Lisheng He            |
| <b>Inspection date</b>               |                     | 2023.09.14                                                                                  | <b>Report time</b> | 2023.09.14            |
| <b>Result</b>                        | <b>CT Value</b>     | <b>Channel</b>                                                                              |                    | <b>CT Value</b>       |
|                                      |                     | FAM                                                                                         |                    | N/A                   |
|                                      |                     | ROX                                                                                         |                    | 28.06                 |
|                                      | <b>Curve figure</b> |                                                                                             |                    |                       |
| <b>Inspection and judgment basis</b> |                     | <b>FAM Channel</b>                                                                          | <b>ROX Channel</b> | <b>Interpretation</b> |
|                                      |                     | Positive control                                                                            | Ct<35              | Reagents works        |
|                                      |                     | Positive control                                                                            | Ct>35              | Reagents not work     |
|                                      |                     | Sample no Ct                                                                                | Ct<35              | Negative              |
|                                      |                     | Sample Ct<40                                                                                | Ct<35              | Positive              |
|                                      |                     | Sample no Ct                                                                                | Ct>35              | PCR inhibition        |
| <b>Conclusion</b>                    |                     | <b>SK-MEL-28 cells were not contaminated by mycoplasma</b>                                  |                    |                       |
