# Supplementary material for: Molecular landmarks of tumor disulfidptosis across cancer types to promote disulfidptosis-target therapy
Source: PubMed Central journal article supplement — Redox Biol. 2023 Nov 19;68:102966. doi: 10.1016/j.redox.2023.102966 (PMC10698012; doi:10.1016/j.redox.2023.102966), 2023-11-19
Supplement: mmc3.pdf [file mmc3.pdf]

# Supplementary Materials for

## **Multi-omics characterization of disulfidptosis-related molecular features to promote disulfidptosis-targeted therapy**

Deze Zhao<sup>1-6\*</sup>, Yu Meng<sup>1-5\*</sup>, Yating Dian<sup>1-5</sup>, Qian Zhou<sup>1-5</sup>, Yuming Sun<sup>7</sup>, Jiayuan Le<sup>1-5</sup>, Furong Zeng<sup>8,#</sup>, Xiang Chen<sup>1-5#</sup>, Yi He<sup>1-5#</sup>, Guangtong Deng<sup>1-5#</sup>

\*Equal Contribution

#Correspondence: Guangtong Deng, dengguagntong@outlook.com;

### **This file includes:**

Figures. S1 to S10

Supplementary Tables titles

Cell identification certificate

Supplementary Figures

Figure S1

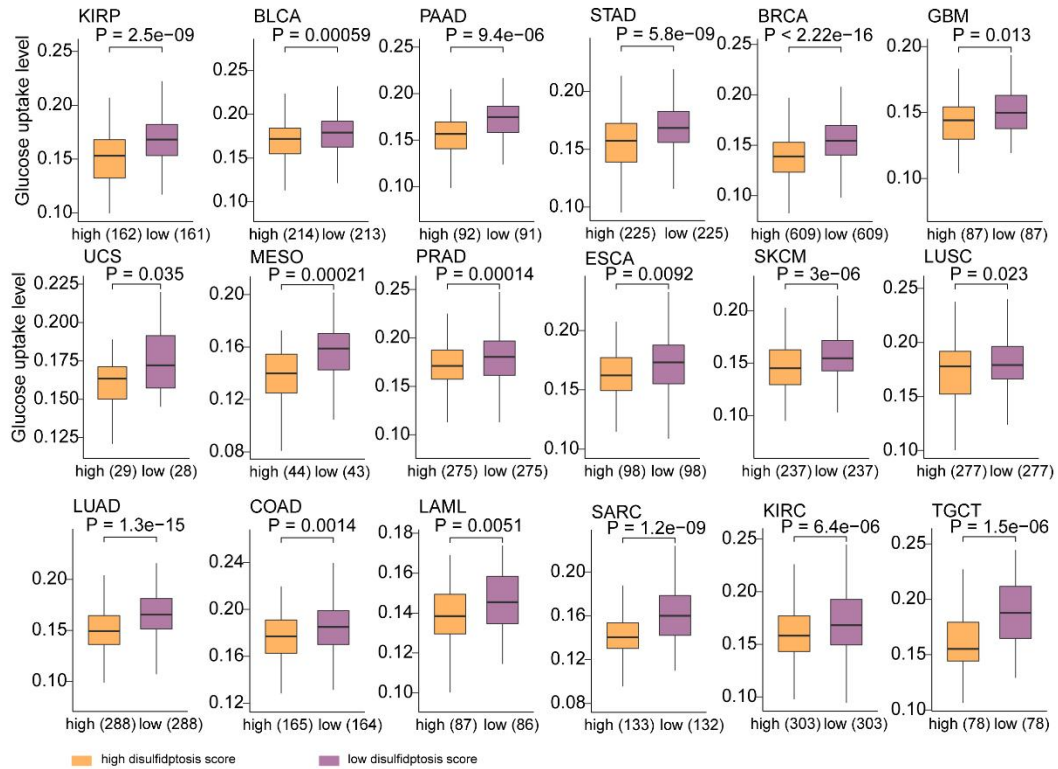

Supplementary Fig.1. Boxplot shows the difference of glucose uptake level between the Disulfidptosis score-high and Disulfidptosis score-low groups among cancer types.

Figure S2

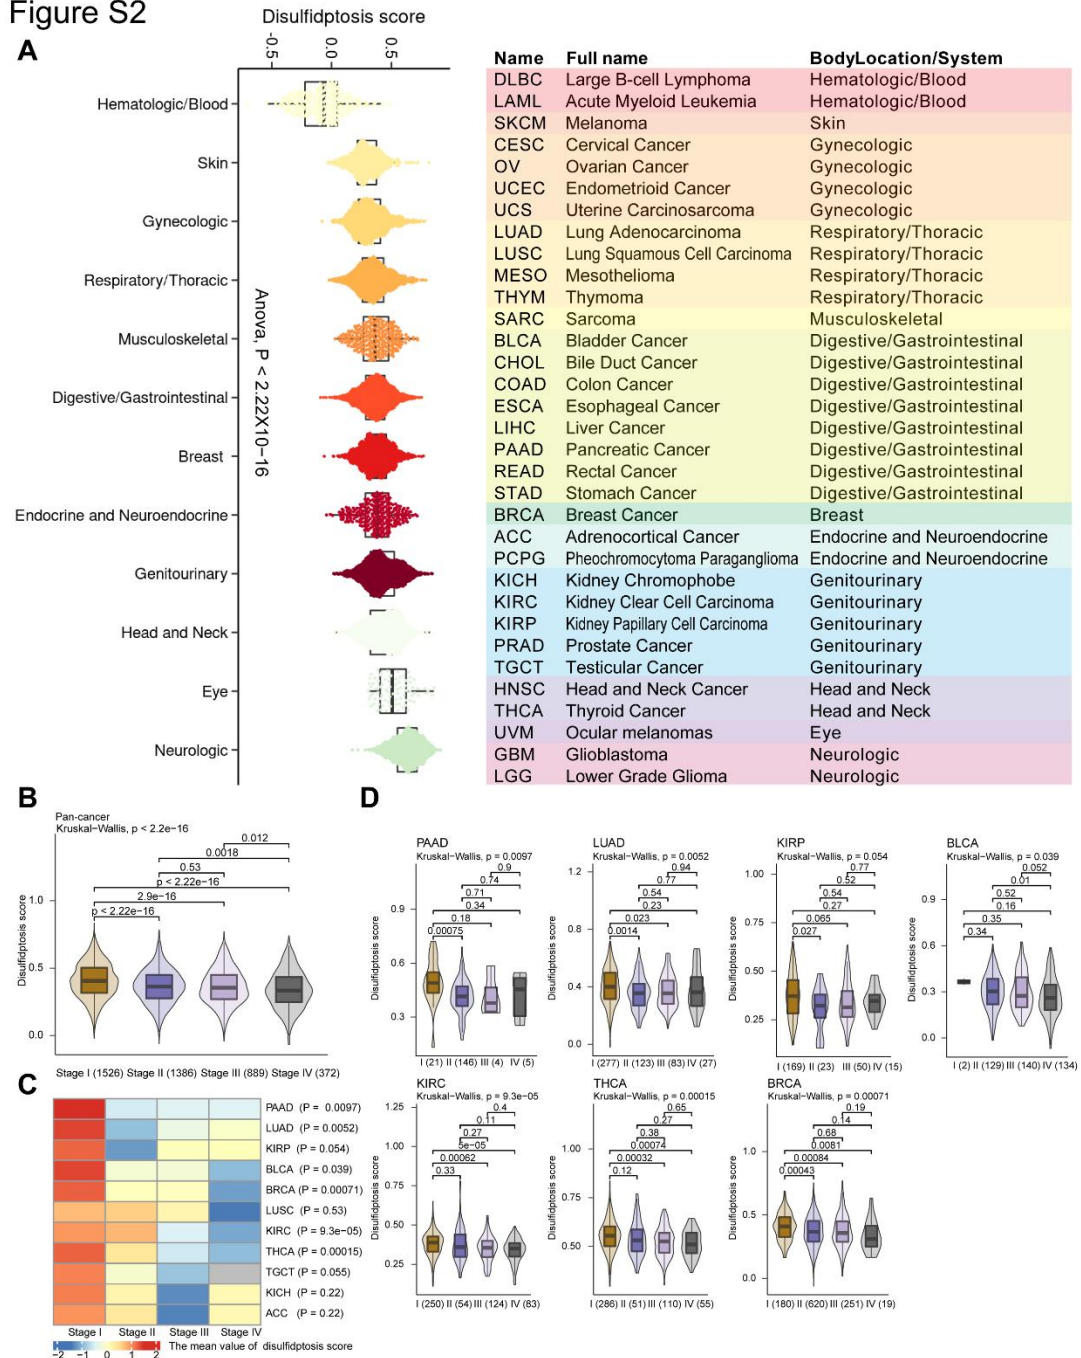

Supplementary Fig.2. (A) Disulfidptosis scores for body location of cancer types, based on the 23 disulfidptosis-related genes mRNA abundance. Body locations are sorted by the median disulfidptosis score for each body location. The right panel shows the cancers by body location/system. (B) The difference of disulfidptosis score among tumor staging. P-value was determined by Wilcoxon rank-sum test. (C) Disulfidptosis score in tumor staging of different cancer types. The color means the scaled disulfidptosis score among tumor staging. (D) The difference of disulfidptosis score among tumor staging in cancer types. P-value was accessed by Kruskal-Wallis test, followed by Wilcoxon rank-sum test.

Figure S3

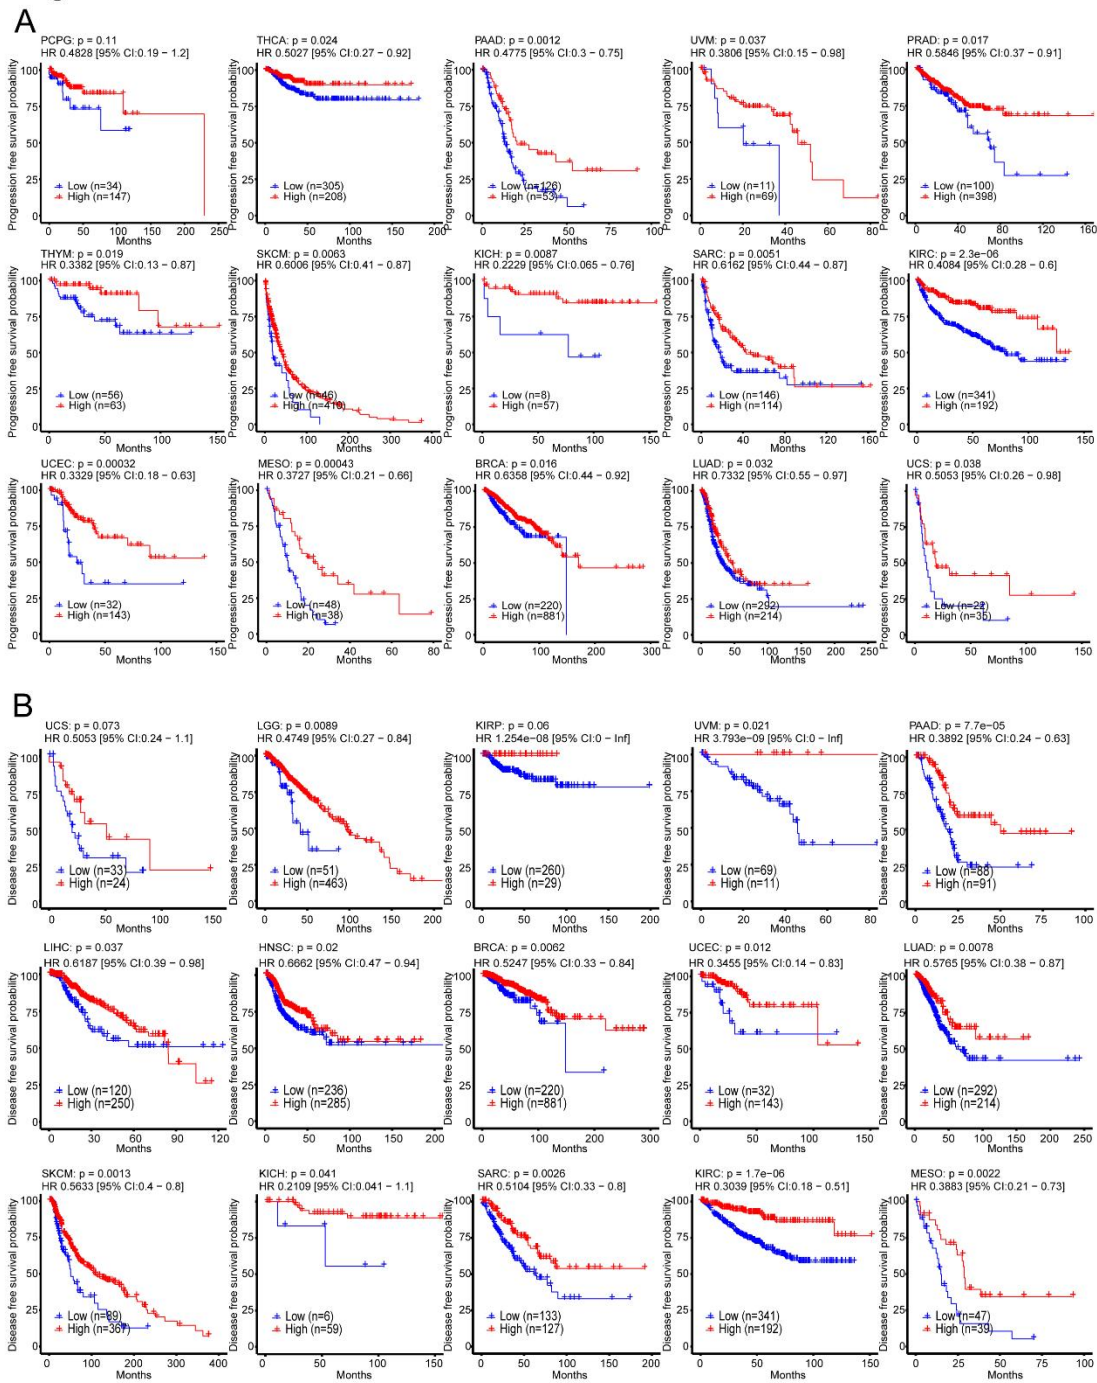

Supplementary Fig.3. The clinical relevance of disulfidptosis across cancer types. Kaplan-Meier curves show that patients with higher disulfidptosis score (red) exhibited better progression free survival times (A) and disease free survival times (B) compared to patients with lower disulfidptosis score across cancer types.

Figure S4

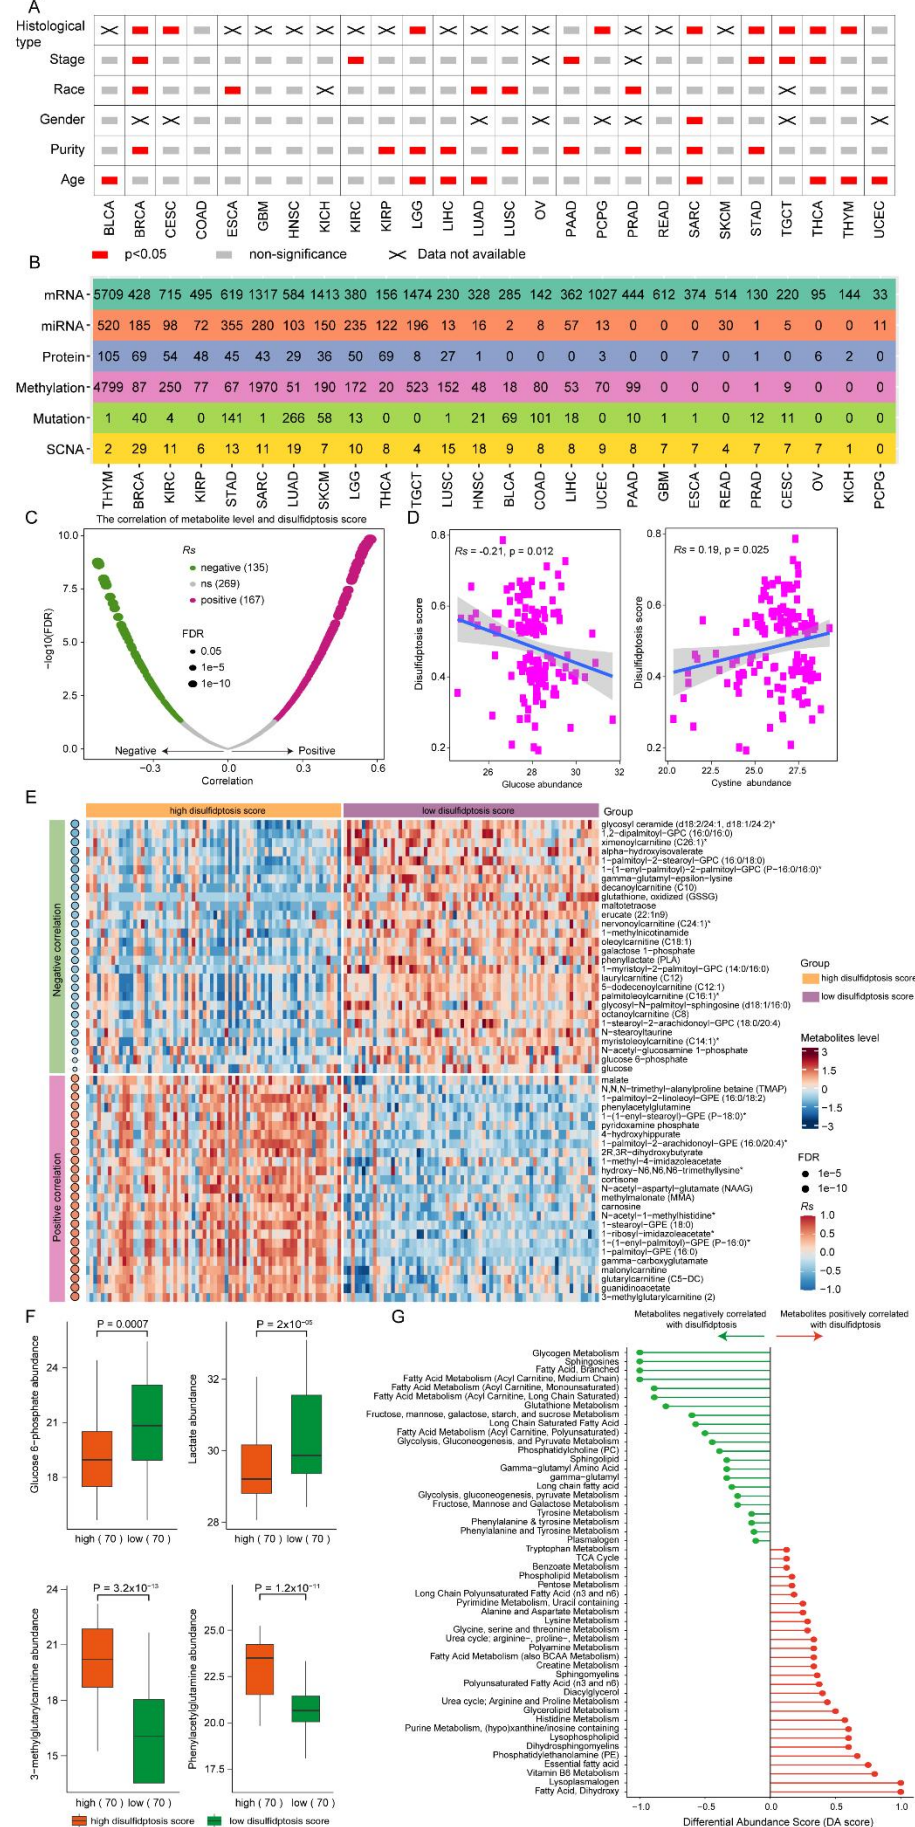

Supplementary Fig.4. Propensity score algorithm and the disulfidptosis-related molecular patterns altered in cancer types. (A) Potential confounding factors between disulfidptosis score-high and disulfidptosis score-low tumors across 26 cancer types. Heatmap shows p-values (two-sided t-test for continuous variables, including age at diagnosis and tumor purity, and chi-squared test for discrete variables, including gender, race, pathologic stage, and histological type) with significance ( $p < 0.05$ , red). Features marked as X indicate data not available. (B) Heatmap shows the number of each altered molecular features (mRNA, miRNA, methylation, mutation, protein, and SCNA) in disulfidptosis score-high (red) and disulfidptosis score-low (blue) groups from TCGA tumor samples. (C) Pearson's correlation between metabolite level and disulfidptosis score. Magenta point:  $R_s > 0.18$ ,  $FDR < 0.05$ ; green point:  $R_s < -0.18$ ,  $FDR < 0.05$ ; gray point: non-significant correlation (ns). (D) Scatter plot at the left panel shows the significant negative correlation between glucose abundance level and disulfidptosis score, and the right panel shows the significant positive correlation between cystine abundance level and disulfidptosis score (pearson's correlation). (E) Heatmap shows the significant alteration between disulfidptosis score-high samples ( $n = 70$ ) and disulfidptosis score-low samples ( $n = 70$ ) in ccRCC. The left panel shows the metabolites most significantly associated with the disulfidptosis score. (F) Boxplot shows the difference of metabolites level (such as Glucose 6-phosphate, lactate, 3-methylglutaryl carnitine and phenylacetylglutamine) between the Disulfidptosis score-high and Disulfidptosis score-low groups. (G) Pathway-based analysis of metabolic changes in metabolites positively correlated (yellow dot) vs. negatively (blue dot) correlated with disulfidptosis score. The differential abundance (DA) score  $> 0$  indicates pathways enriched for metabolites that are positively correlated with disulfidptosis ( $n=167$ ), and the DA score  $< 0$  indicates pathways enriched for metabolites that are negatively correlated with disulfidptosis ( $n=135$ ).

Figure S5

A

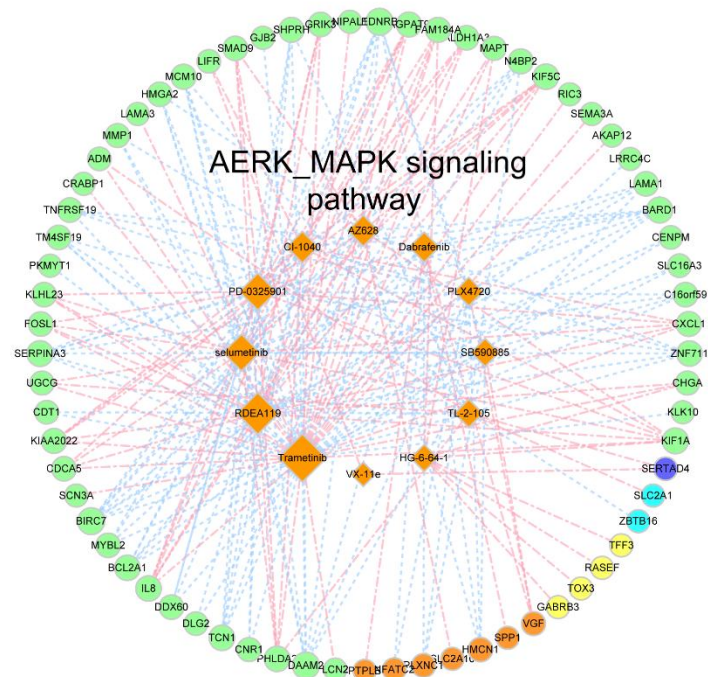

B

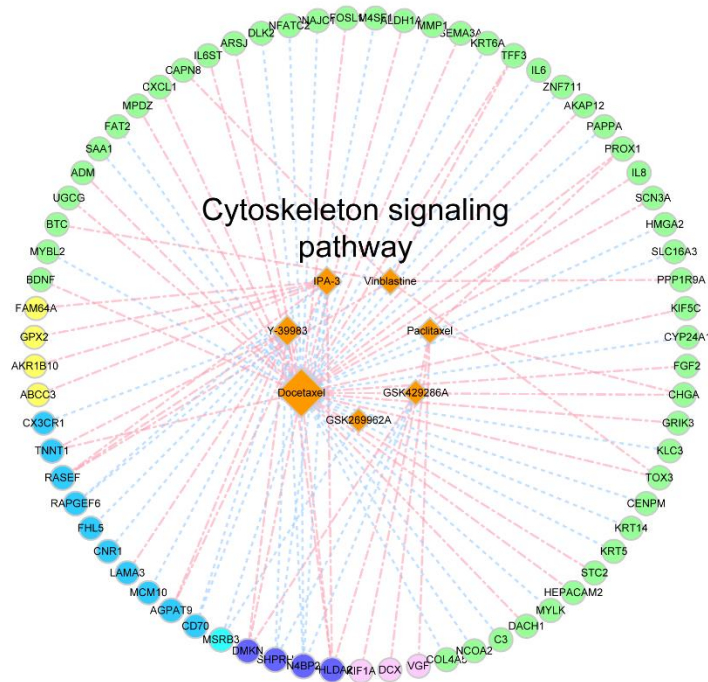

Supplementary Fig.5. Disulfidptosis-related genes (green point) correlate to drug-sensitive (cyan) or drug-resistant (magenta) response to drug (orange point) involved in signaling pathways. (A) ERK/MAPK signaling pathway, (B) cytoskeleton signaling pathway.

Figure S6

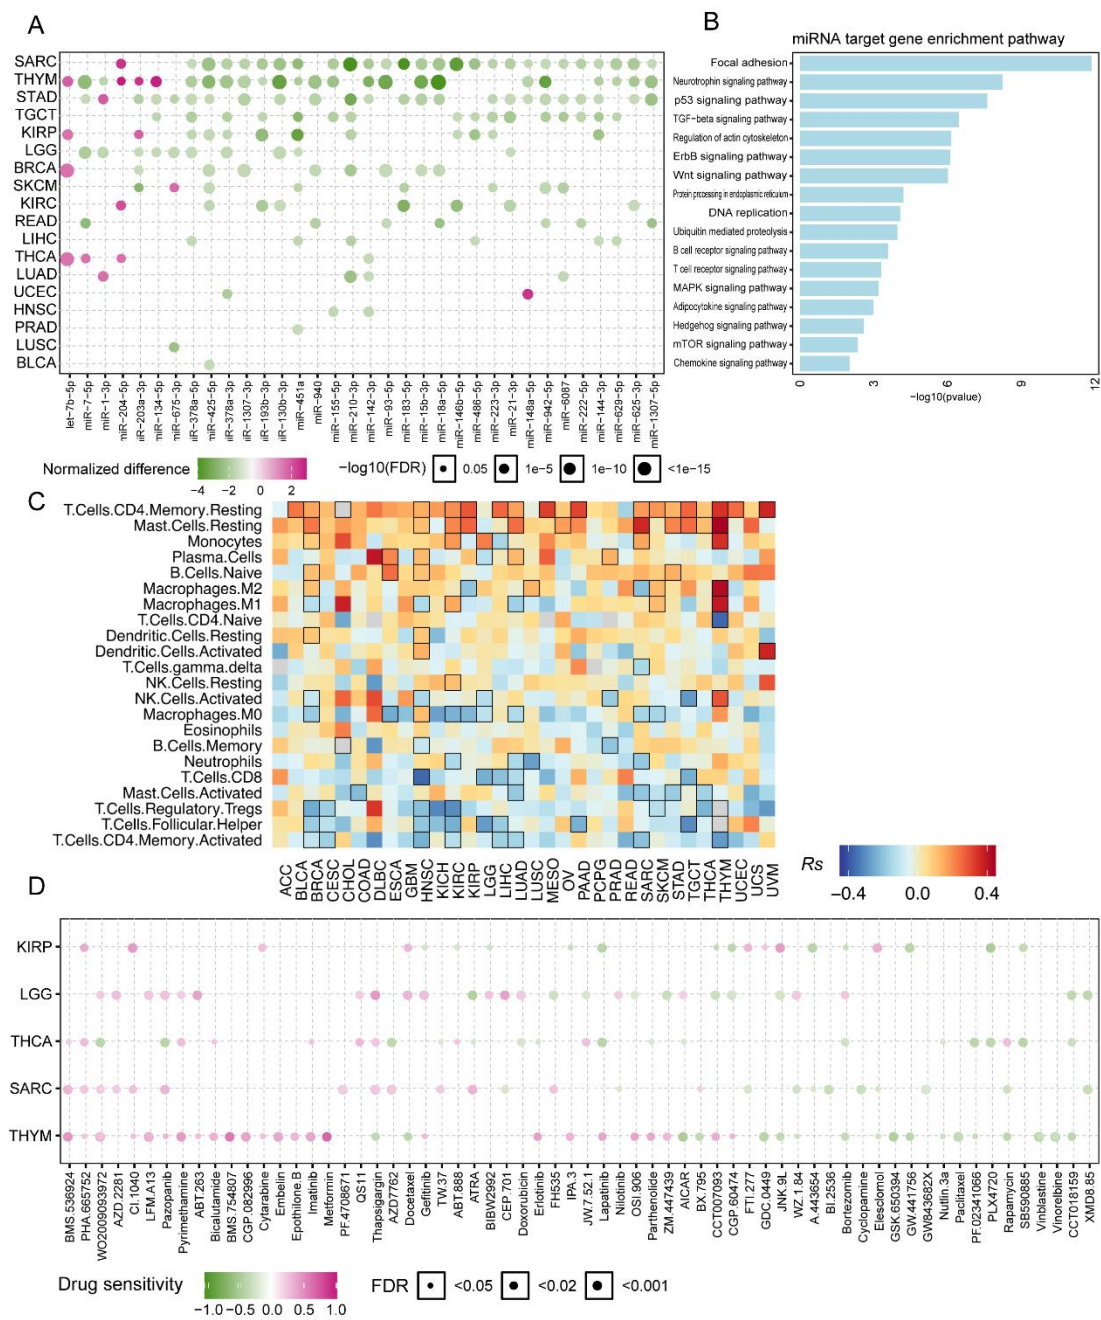

Supplementary Fig 6. Disulfidptosis-related miRNA and protein signatures. (A) Altered miRNA in the disulfidptosis score-high group vs. the disulfidptosis score-low group for multiple cancers. Color indicates the difference in miRNA expression; point size indicates FDR for miRNA expression. (B) Barplot shows the Significant Kyoto Encyclopedia of Genes and Genomes (KEGG) pathways enriched by mRNAs in the miRNA-target regulatory network. (C) The Spearman's correlation between disulfidptosis score and the infiltration level of 22 immune cell types in pan-cancers (n = 10 205). Black box indicates the significant correlations ( $|R_s| > 0.2$  and  $FDR < 0.05$ ). (D) Spearman's correlation between protein level of YAP (ps127) and imputed



drug response in five cancer types. The green point denotes drug sensitivity; the magenta point denotes drug resistance.

Figure S7

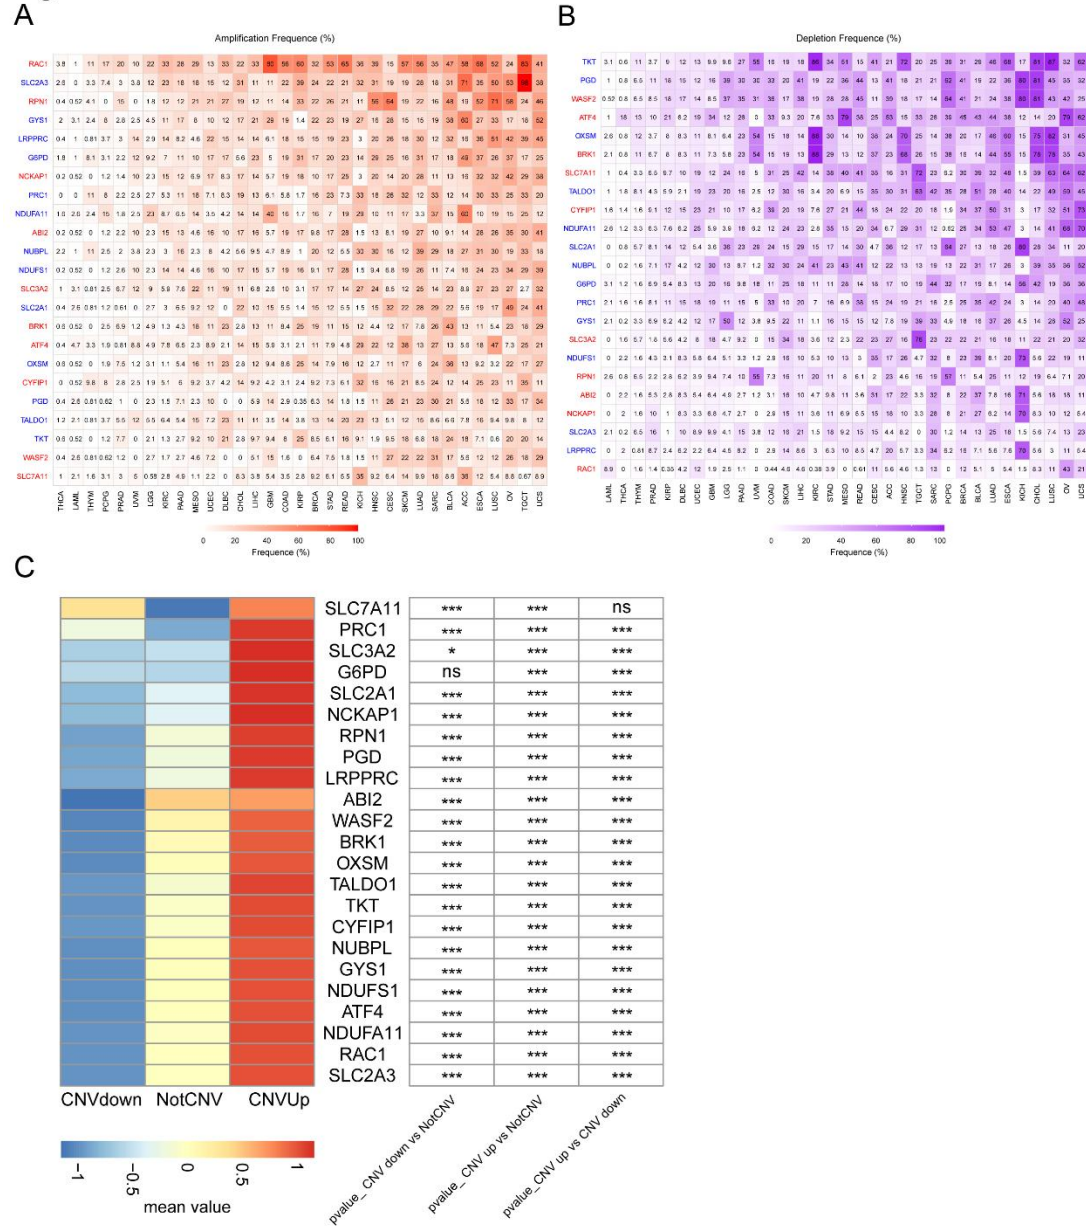

Supplementary Fig 7. Somatic copy number alterations of disulfidptosis regulators in cancer. (A-B) Distribution of amplification (A), and deletion (B) frequencies of 23 disulfidptosis signatures over cancer types. The numbers in the graph represent the specific frequency values. The color of copy number alteration is proportional to the frequency. (C) The expression of 23 disulfidptosis signatures among somatic copy number alterations groups in TCGA tumor samples from 26 cancer types.

Figure S8

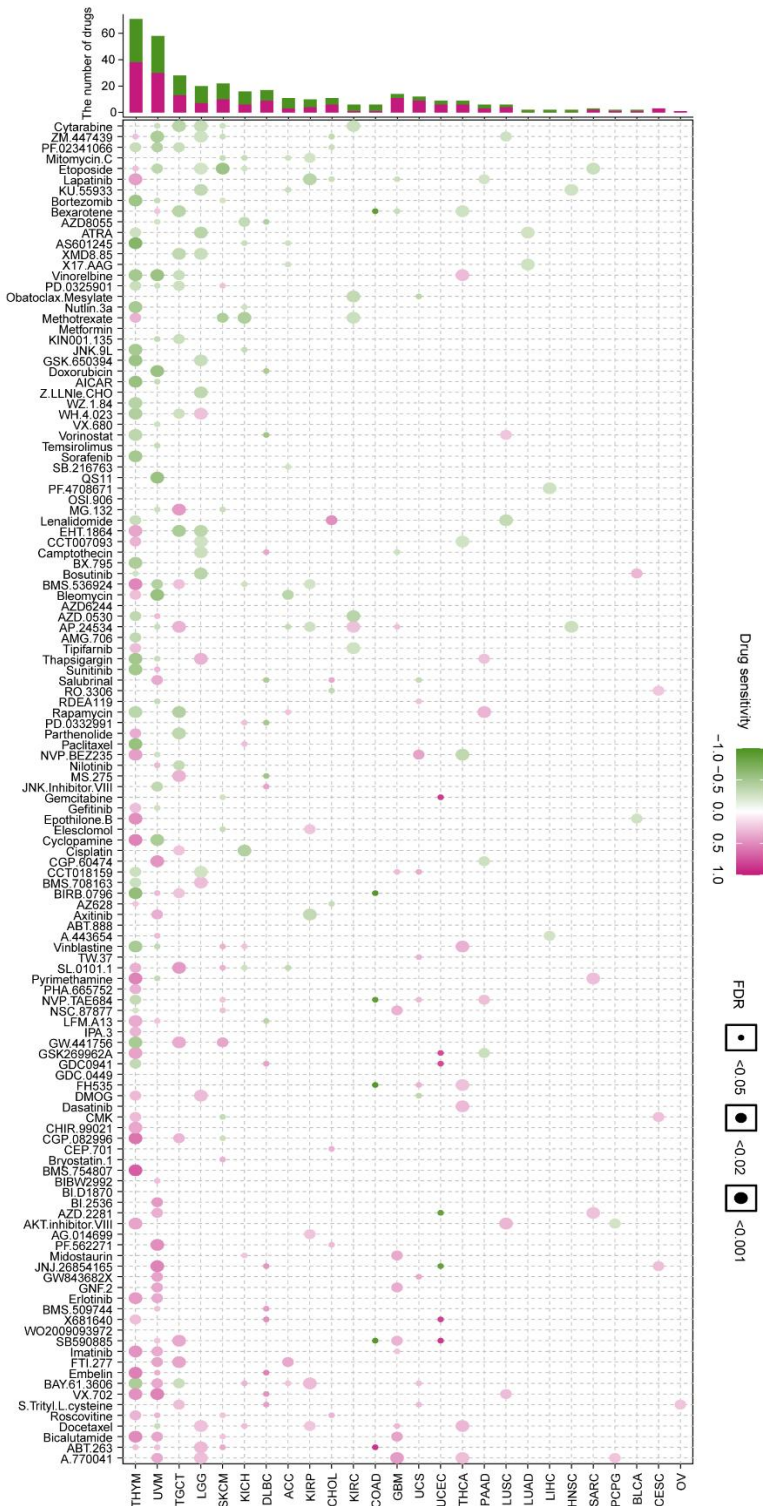

Supplementary Fig.8. The disulfidptosis effects on drug response. Spearman's correlation between imputed drug response and disulfidptosis score across 26 cancer types in TCGA patients. The bar plot (top panel) shows the number of drugs that positively (magenta, drug-resistant) and negatively (green, drug-sensitive) correlate to the disulfidptosis score in each cancer type.

Figure S9

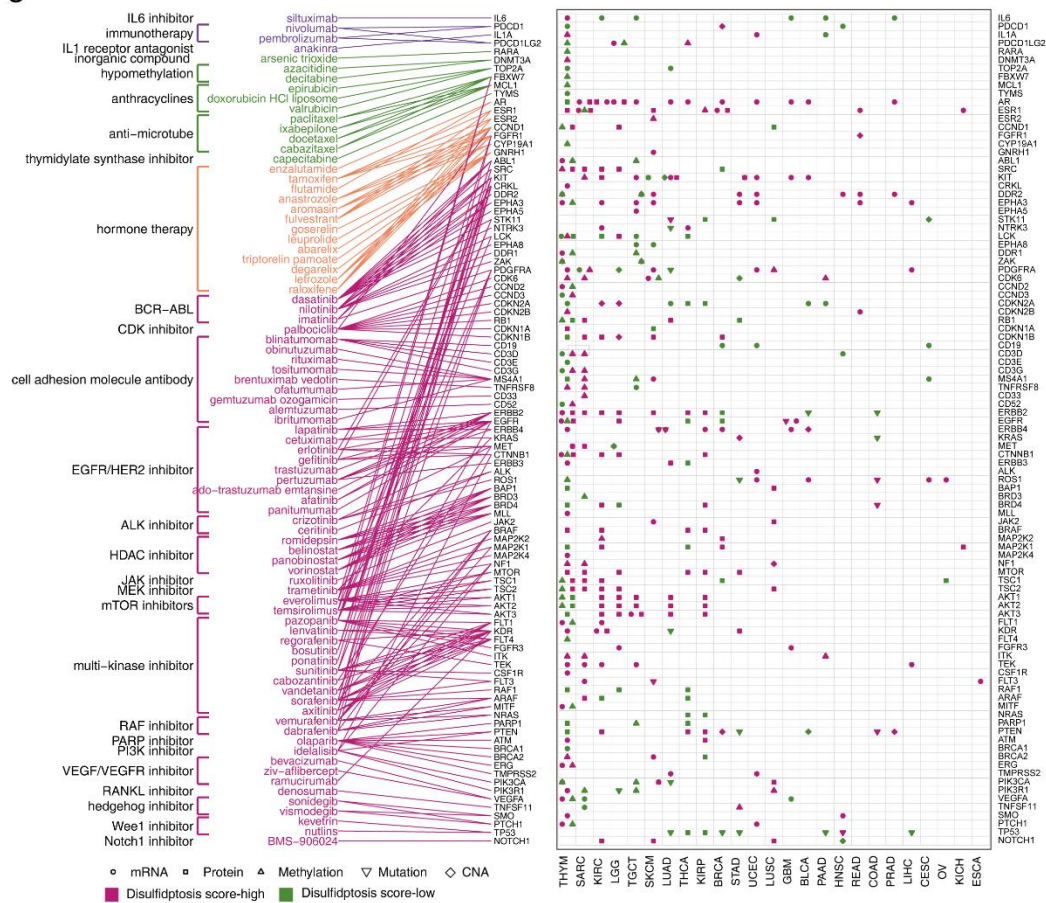

Supplementary Fig 9. Summary characteristics of FDA-approved drugs and their linked clinically actionable genes (left) and alterations of these genes at mRNA, protein, DNA methylation, mutation and SCNA levels based on disulfidptosis score-high (magenta) or score-low (green) samples across 26 cancer types (right). The different symbol shapes represent different types of molecular data.

Figure S10

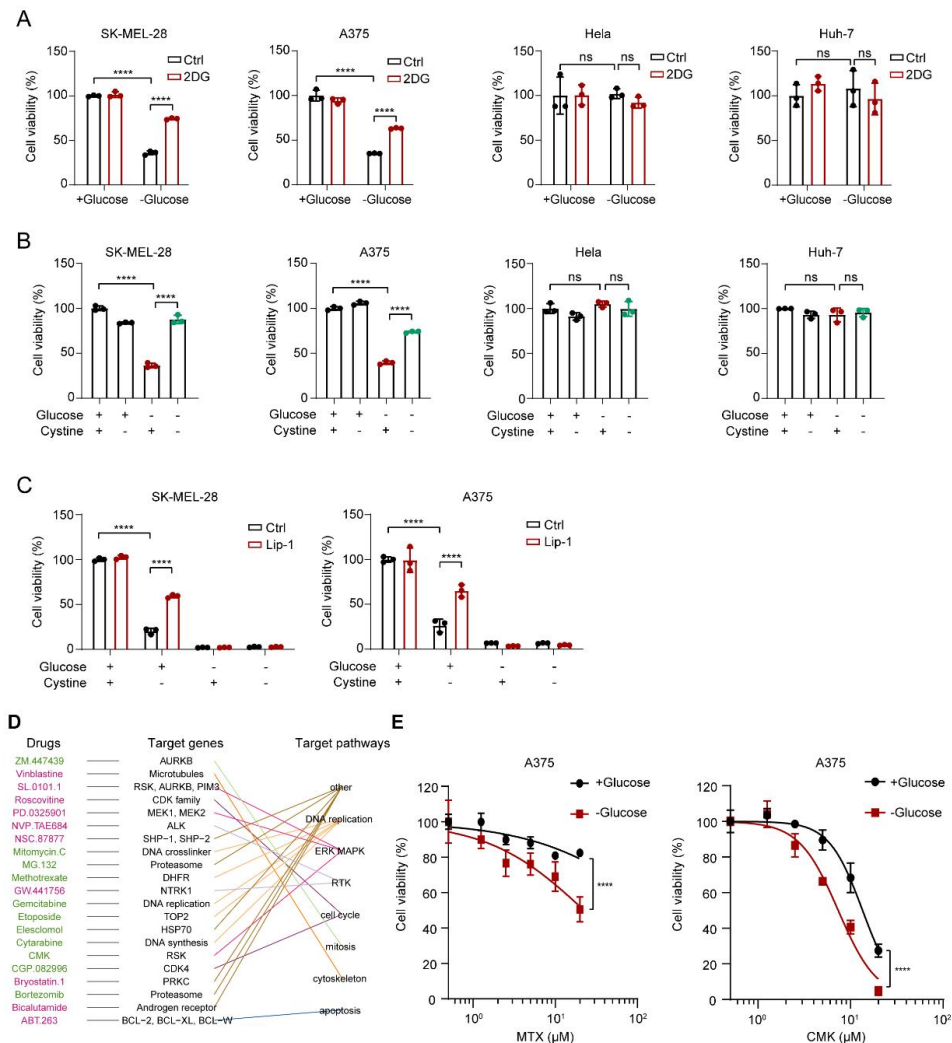

Supplementary Fig 10. (A) Relative cell viability in the SK-MEL-28, A375 (Red label; Disulfidptosis-score high), HeLa and Huh-7 (Green label; Disulfidptosis-score low) cells cultured in glucose-containing (+Glucose) or glucose-free (-Glucose) medium with or without 2 mM 2-Deoxy-D-glucose (2DG) for about 16 hours. (B) Relative cell viability in the SK-MEL-28, A375 (Red label; Disulfidptosis-score high), HeLa and Huh-7 (Green label; Disulfidptosis-score low) cells cultured in glucose-containing, cystine-free, glucose-free, or glucose/cystine double-free medium for about 16 hours. (C) Relative cell viability in the SK-MEL-28 and A375 cells cultured in glucose-containing, cystine-free, glucose-free, or glucose/cystine double-free medium with or without 10  $\mu$ M liproxtatin-1 (lip-1) for about 36 hours. (D) The targeted genes and targeted pathways of drugs in disulfidptosis status in TCGA-SKCM. (E) Dose-response curves for relative cell viability of methotrexate and CMK in glucose-containing (+Glucose) and glucose-free (-Glucose) conditions in the A375 melanoma cells.

## **Supplementary Tables**

**Supplementary Table 1. Summary of disulfidptosis-related features.** A total of 23 disulfidptosis-related genes were collected from published articles.

**Supplementary Table 2. Disulfidptosis scores for 25 types of cancer that including 760 cancer cell lines.**

**Supplementary Table 3. Spearman's rank correlation between disulfidptosis-related mRNA expression levels and drug sensitivity (AUC value) across pan-cancer.**

**Supplementary Table S4 : Spearman's rank correlation between disulfidptosis-related proteins expression levels and drug sensitivity (AUC value) across pan-cancer.**

**Supplementary Table S5 : Spearman ' s rank correlation between disulfidptosis-related miRNAs expression levels and drug sensitivity (AUC value) across pan-cancer.**
